# Supplementary material
Source: ML conference proceedings conference paper supplement (https://openreview.net/forum?id=Te-9Ig5ftj)
Supplement: supplementary_material [file attachment]

## A Appendix

### A.1 Derivation of the continuous-time representation of SGD

Consider the update step in mini-batch SGD

$$\theta_{k+1} = \theta_k - \alpha \eta \nabla f_{\mathcal{B}_k}(\theta_k), \quad (16)$$

where  $\alpha \eta$  is the step-size, in which  $\eta$  is the maximal allowed step-size, and  $\alpha$  is the adjustment factor as was also done in [14], and  $\nabla f_{\mathcal{B}_k}(\theta_k) = \frac{1}{m_k} \sum_{i=1}^m \nabla f_i(\theta_k)$  is a mini-batch gradient of size  $m_k$ , with  $\nabla f_i$  i.i.d. uniformly sampled from the data points  $i \in [1, \dots, n]$ . Let the empirical covariance of  $\nabla f_i(\theta)$  be denoted as  $\Sigma(\theta) = \frac{1}{n} \sum_{i=1}^n (\nabla f_i(\theta) - \nabla f(\theta))(\nabla f_i(\theta) - \nabla f(\theta))^T$ , then by the assumption above, the covariance of  $\nabla f_{\mathcal{B}_k}(\theta)$  is  $\text{cov}(\nabla f_{\mathcal{B}_k}(\theta)) = \Sigma(\theta)/m_k$ . The update step in Eq. (16) can now be rewritten in the following way:

$$\theta_{k+1} = \theta_k - \alpha \nabla f(\theta_k) \eta + \alpha \eta (\nabla f(\theta_k) - \nabla f_{\mathcal{B}_k}(\theta_k)) \quad (17)$$

The last term is normally distributed with zero-mean (because  $E[\nabla f_{\mathcal{B}_k}(\theta_k)] = \nabla f(\theta_k)$ ) and  $\text{cov}[(\nabla f(\theta_k) - \nabla f_{\mathcal{B}_k}(\theta_k))\alpha\eta] = \text{cov}[\nabla f_{\mathcal{B}_k}(\theta_k)]\alpha^2\eta^2 = \frac{\Sigma(\theta_k)}{m_k}\alpha^2\eta^2$ . Introducing the random variable  $\Delta B_k \sim \mathcal{N}(0, \eta)$ , we can rewrite the update as

$$\theta_{k+1} = \theta_k - \alpha \nabla f(\theta_k) \eta + \alpha \sqrt{\eta \frac{\Sigma(\theta_k)}{m_k}} \cdot \Delta B_k \quad (18)$$

Taking the limit by identifying  $\eta \rightarrow dt$  and  $\Delta B_k \rightarrow dB(t)$ , From this, an SDE of the following form can be derived:

$$d\theta_t = -\alpha \nabla f(\theta_t) dt + \alpha \sqrt{\eta \frac{\Sigma(\theta_t)}{m_t}} dB_t. \quad (19)$$

The SDE derived in Eq. (19) is a continuous-time representation of the SGD in the sense that the SGD update step in Eq. (18) is the Euler-Maruyama discretization of the SDE in Eq. (19). For a more formal analysis, Li et al. also consider SGD as a discretization of an SDE in Theorem 1 within [14]. The weighting factor appears in Eq. (10) of [14]. Note, that the step-size to batch-size ratio  $\frac{\eta}{m_t}$  does not appear there, but can be found in Eq. (5) in [11] (but here the weighting factor  $\alpha$  doesn't appear).

### A.2 Average decoupled dynamics of SDE

Let the loss function be the multi-dimensional quadratic

$$f(\theta) = \frac{1}{2} \theta^T A \theta, \quad (20)$$

where we assume that  $A$  is diagonalizable, i.e.  $A = V^T \Lambda V$ . Under the assumption that  $\Sigma(\theta) = \Sigma$  is constant, the continuous-time model of SGD is

$$d\theta_t = -\alpha A \theta_t dt + \alpha \sqrt{\frac{\eta \Sigma}{m(t)}} dB_t. \quad (21)$$

Now we decouple the dimensions by transforming the SDE using Ito's Lemma with  $Y_t = V \theta_t$ ,

$$dY_t = -\alpha V A \theta_t dt + \alpha V \sqrt{\frac{\eta \Sigma}{m(t)}} dB_t \quad (22)$$

$$= -\alpha V V^T \Lambda V \theta_t dt + \alpha V \sqrt{\frac{\eta \Sigma}{m(t)}} dB_t \quad (23)$$

$$= -\alpha \Lambda Y_t dt + \alpha \sqrt{\frac{\eta}{m(t)}} V \sqrt{\Sigma} dB_t. \quad (24)$$

With  $v_i$  being the  $i$ -th row of  $V$ , we can write down an one-dimensional SDE for each dimension

$$dY_{i,t} = -\alpha\lambda_i Y_{i,t} dt + \alpha\sqrt{\frac{\eta}{m(t)}} v_i^T \sqrt{\Sigma} dB_t. \quad (25)$$

If we denote  $\sigma_i := v_i^T \Sigma$ , we have

$$dY_{i,t} = -\alpha\lambda_i Y_{i,t} dt + \alpha\sqrt{\frac{\eta\sigma_i}{m(t)}} dB_t \quad \text{for } i = 1, \dots, d. \quad (26)$$

Now we apply Ito's Lemma once again to transform each SDE with  $Z_{i,t} = \frac{1}{2}\lambda_i Y_{i,t}^2$ :

$$dZ_{i,t} = \left[ -\alpha\lambda_i^2 Y_{i,t}^2 + \frac{1}{2}\lambda_i \frac{\alpha^2 \eta \sigma_i}{m(t)} \right] dt + \alpha\lambda_i Y_{i,t} \sqrt{\frac{\eta\sigma_i}{m(t)}} v_i^T dB_t \quad (27)$$

$$= \left[ -2\alpha\lambda_i Z_{i,t} + \frac{1}{2}\lambda_i \frac{\alpha^2 \eta \sigma_i}{m(t)} \right] dt + \alpha\lambda_i Y_{i,t} \sqrt{\frac{\eta\sigma_i}{m(t)}} v_i^T dB_t \quad (28)$$

Taking expectations on both sides and substituting  $E[Z_{i,t}] = g_i(t)$  we finally arrive at a system of ODEs

$$E[dZ_{i,t}] = \left( -2\alpha\lambda_i E[Z_{i,t}] + \frac{1}{2}\sigma_i \lambda_i \frac{\alpha^2 \eta}{m(t)} \right) dt \quad (29)$$

$$\frac{dg_i(t)}{dt} = -2\alpha\lambda_i g_i(t) + \frac{1}{2}\sigma_i \lambda_i \frac{\alpha^2 \eta}{m(t)}, \quad \text{for } i = 1, \dots, d. \quad (30)$$

### A.3 Solving the HJB-equation

Recall the HJB-equation corresponding to the our control problem

$$\partial_t J(\underline{g}, t) + \min_{m \in [m_{\min}, m_{\max}]} \left\{ (1 - \gamma)m - 2\alpha \sum_{i=1}^d \lambda_i g_i \partial_{g_i} J(\underline{g}, t) + \frac{1}{2} \frac{\alpha^2 \eta}{m} \sum_{i=1}^d \sigma_i \lambda_i \partial_{g_i} J(\underline{g}, t) \right\} = 0. \quad (31)$$

Since  $m$  takes only positive values, the optimal  $m^*$  depends on the sign of  $\sum_{i=1}^d \sigma_i \lambda_i \partial_{g_i} J(\underline{g}, t)$ . If it is positive, then the expression in Eq. (31) is convex for positive  $m$  and we find  $m^*$  where the gradient vanishes, that is  $m_t^* = \sqrt{\frac{1}{2} \frac{\alpha^2 \eta}{(1-\gamma)} \sum_{i=1}^d \sigma_i \lambda_i \partial_{g_i} J(\underline{g}, t)}$  (assuming that it is in  $[m_{\min}, m_{\max}]$ ). Otherwise the optimal  $m^*$  is just the smallest feasible batch-size  $m_{\min}$ . Thus, we have

$$m_t^* = \begin{cases} \min \left( m_{\max}, \max \left( \sqrt{\frac{1}{2} \frac{\alpha^2 \eta}{(1-\gamma)} \sum_{i=1}^d \sigma_i \lambda_i \partial_{g_i} J(\underline{g}, t)}, m_{\min} \right) \right) & \text{if } \sum_{i=1}^d \sigma_i \lambda_i \partial_{g_i} J(\underline{g}, t) > 0 \\ m_{\min} & \text{else.} \end{cases} \quad (32)$$

Irrespective what batch-size is chosen, the resulting PDE can be solved via the ansatz

$$J(\underline{g}, t) = \sum_{i=1}^d g_i k_i(t) + l(t), \quad (33)$$

so we will have  $\partial_{g_i} J(\underline{g}, t) = k_i(t)$ .

If  $m_t^* = \sqrt{\frac{1}{2} \frac{\alpha^2 \eta}{(1-\gamma)} \sum_{i=1}^d \sigma_i \lambda_i \partial_{g_i} J(\underline{g}, t)}$ , then the resulting PDE reads

$$\partial_t J(\underline{g}, t) + \sqrt{2(1-\gamma)\alpha^2 \eta \sum_{i=1}^d \sigma_i \lambda_i \partial_{g_i} J(\underline{g}, t)} - 2\alpha \sum_{i=1}^d \lambda_i g_i \partial_{g_i} J(\underline{g}, t) = 0 \quad (34)$$

with the boundary condition  $J(\underline{g}, T) = \sum_{i=1}^d g_i k_i(T) + l(T) = \gamma \sum_{i=1}^d g_i$ . This is  $k_i(T) = 1$  for all  $i = 0, \dots, d$  and  $l(T) = 0$ . Plugging in the ansatz we get

$$\sum_{i=1}^d g_i k'_i(t) + l'(t) + \sqrt{2(1-\gamma)\alpha^2\eta \cdot \sum_{i=1}^d \sigma_i \lambda_i k_i(t) - 2\alpha \sum_{i=1}^d \lambda_i g_i k_i(t)} = 0 \quad (35)$$

$$\sum_{i=1}^d g_i (k'_i(t) - 2\alpha \lambda_i k_i(t)) + l'(t) + \sqrt{2(1-\gamma)\alpha^2\eta \sum_{i=1}^d \sigma_i \lambda_i k_i(t)} = 0. \quad (36)$$

Since the last two terms are independent of  $g_i$ , the first term has to vanish, so we must have

$$k'_i(t) - 2\alpha \lambda_i k_i(t) = 0 \quad \text{for } i = 0, \dots, d. \quad (37)$$

With the boundary condition  $k_i(T) = 1$  we get the solution

$$k_i(t) = \gamma \cdot e^{-2\alpha \lambda_i (T-t)}, \quad \text{for } i = 1, \dots, d, \quad (38)$$

from which we can conclude  $\sum_{i=1}^d \sigma_i \lambda_i \partial_{g_i} J(\underline{g}, t) = \gamma \sum_{i=1}^d \sigma_i \lambda_i \cdot e^{-2\alpha \lambda_i (T-t)}$ . Similarly, if  $m_t^* = m = \text{const.}$  (that is  $m_{\min}$  or  $m_{\max}$ ), the resulting PDE reads

$$\partial_t J(\underline{g}, t) + (1-\gamma)m - 2\alpha \sum_{i=1}^d \lambda_i g_i \partial_{g_i} J(\underline{g}, t) + \frac{1}{2} \frac{\alpha^2 \eta}{m} \sum_{i=1}^d \sigma_i \lambda_i \partial_{g_i} J(\underline{g}, t) = 0, \quad (39)$$

with the boundary condition  $J(\underline{g}, T) = \gamma \sum_{i=1}^d g_i$ . Similar to above, with the ansatz  $J(\underline{g}, t) = \sum_{i=1}^d g_i k_i(t) + l(t)$  the PDE simplifies to

$$\sum_{i=1}^d g_i k'_i(t) + l'(t) + (1-\gamma)m - 2\alpha \sum_{i=1}^d \lambda_i g_i k_i(t) + \frac{1}{2} \frac{\alpha^2 \eta}{m} \sum_{i=1}^d \sigma_i \lambda_i \partial_{g_i} J(\underline{g}, t) = 0 \quad (40)$$

$$\sum_{i=1}^d g_i (k'_i(t) - 2\alpha \lambda_i k_i(t)) + l'(t) + (1-\gamma)m + \frac{1}{2} \frac{\alpha^2 \eta}{m} \sum_{i=1}^d \sigma_i \lambda_i \partial_{g_i} J(\underline{g}, t) = 0, \quad (41)$$

from which we can conclude the same solution for  $k_i(t)$  as in Eq. (38).

Thus we have the following batch-size schedule: In the convex case, i.e.  $\lambda_i > 0, \forall i$  (concave case, i.e.  $\lambda_i < 0, \forall i$ )  $\gamma \sum_{i=1}^d \sigma_i \lambda_i \cdot e^{-2\alpha \lambda_i (T-t)} \underset{(<)}{>} 0$  for all  $\underline{g}, t$ .

$$m_t^* = \begin{cases} \min \left( m_{\max}, \max \left( m_{\min}, \sqrt{\frac{\alpha^2 \eta}{2} \frac{\gamma}{(1-\gamma)} \sum_{i=1}^d \sigma_i \lambda_i e^{-2\alpha \lambda_i (T-t)}} \right) \right) & \text{if } f(\theta) \text{ is convex} \\ m_{\min} & \text{if } f(\theta) \text{ is concave.} \end{cases} \quad (42)$$

If the objective  $f(\theta)$  is non-convex, we can assume w.l.o.g. that the eigenvalues are ordered, such that  $\lambda_1 < \dots < \lambda_p \leq 0 < \lambda_{p+1} < \dots < \lambda_d$ . From the previous calculations we have that

$$\begin{aligned} \sum_{i=1}^d \sigma_i \lambda_i \partial_{g_i} J(\underline{g}, t) &= \sum_{i=1}^d \sigma_i \lambda_i \gamma \cdot e^{-2\alpha \lambda_i (T-t)} \\ &= \sum_{i=1}^p \sigma_i \lambda_i e^{-2\alpha \lambda_i (T-t)} + \sum_{i=p+1}^d \sigma_i \lambda_i e^{-2\alpha \lambda_i (T-t)} \end{aligned} \quad (43)$$

The first sum is strictly monotonic decreasing and the second sum is strictly monotonic increasing. Further we have for the expression above  $\xrightarrow{t \rightarrow -\infty} -\infty$  and  $\xrightarrow{t \rightarrow +\infty} +\infty$ . This means that there must be

some finite  $t^*$ , for which

$$\left| \sum_{i=1}^p \sigma_i \lambda_i e^{-2\alpha \lambda_i (T-t^*)} \right| = \left| \sum_{i=p+1}^d \sigma_i \lambda_i e^{-2\alpha \lambda_i (T-t^*)} \right| \quad (44)$$

holds.

For  $t < t^*$  the negative eigenvalues dominate and for  $t > t^*$  the positive eigenvalues dominate. Thus the batch-size schedule reads

$$m_t^* = \begin{cases} m_{\min} & \text{if } t \leq t^* \\ \sqrt{\frac{\alpha^2 \eta}{2}} \frac{\gamma}{(1-\gamma)} \sum_{i=1}^d \sigma_i \lambda_i e^{-2\alpha \lambda_i (T-t)} & \text{if } t > t^* \end{cases} \quad (45)$$

In the case where  $d = 2$  and  $\lambda_1 < 0 < \lambda_2$  we can express  $t^*$  explicitly as

$$t^* = T - \frac{1}{2\alpha(\lambda_2 - \lambda_1)} \ln \left( \frac{\sigma_2 \lambda_2}{-\sigma_1 \lambda_1} \right). \quad (46)$$

#### A.4 2D Saddle point with no running cost

We can also look at the case, in which we do not have a running cost in the cost-functional. Recall that we are looking at a saddle point in two dimensions with the eigenvalues  $\lambda_1 < 0 < \lambda_2$  and the dynamics driven by the ODEs

$$\frac{dg_i(t)}{dt} = -2\alpha \lambda_i g_i(t) + \frac{1}{2} \frac{\alpha^2 \eta}{m_t} \sigma_i \lambda_i \quad (47)$$

for  $i = 1, 2$  with some initial condition  $g_i(0) = g_{i,0}$ .

In this case the optimal control problem reads

$$\min_{m \in [m_{\min}, m_{\max}]} J^m(\underline{g}, t) \quad (48)$$

$$\text{with } J^m(\underline{g}, t) = \sum_{i=1}^2 \Psi_i^m(t \rightarrow T, g_i) \quad (49)$$

$$\text{s.t. } J(\underline{g}, T) = \sum_{i=1}^2 \Psi_i^m(T \rightarrow T, g_i) = \sum_{i=1}^2 g_i \quad (50)$$

where  $0 < m_{\min} < m_{\max} < \infty$  are some given constants,  $\underline{g} = (g_1, g_2)$ , and  $\Psi_i^m(t \rightarrow T, g_i)$  refers to the corresponding forward flow map following the respective ODE in Eq. (47) with some batch-size schedule  $m_t$  and the initial condition  $g_i := g_i(t)$  and ending at  $g(T) =: \Psi_i(t \rightarrow T, g_i)$ .

The corresponding HJB-equation reads

$$0 = \partial_t J(\underline{g}, t) + \min_{m \in [m_{\min}, m_{\max}]} \left\{ -2\alpha \sum_{i=1}^2 \lambda_i g_i \partial_{g_i} J(\underline{g}, t) + \frac{1}{2} \frac{\alpha^2 \eta}{m} (\sigma_1 \lambda_1 \partial_{g_1} J(\underline{g}, t) + \sigma_2 \lambda_2 \partial_{g_2} J(\underline{g}, t)) \right\} \quad (51)$$

Only the last term depends on  $m$  and is of the form  $\sim 1/m$ . Thus we have a "bang-bang"-type of control with

$$m_t = \begin{cases} m_{\min} & \text{if } \sigma_1 \lambda_1 \partial_{g_1} J(\underline{g}, t) + \sigma_2 \lambda_2 \partial_{g_2} J(\underline{g}, t) < 0 \\ m_{\max} & \text{if } \sigma_1 \lambda_1 \partial_{g_1} J(\underline{g}, t) + \sigma_2 \lambda_2 \partial_{g_2} J(\underline{g}, t) > 0 \end{cases} \quad (52)$$

Independent of the value of  $m_t$ , the above PDE can be solved via the ansatz  $J(\underline{g}, t) = g_1 k_1(t) + g_2 k_2(t) + l(t)$ . With the boundary condition  $J(\underline{g}, T) = g_1 k_1(T) + g_2 k_2(T) + l(T) \stackrel{!}{=} \sum_{i=1}^2 g_i$ , we eventually find that

$$k_1(t) = e^{-2\alpha\lambda_1(T-t)} \quad (53)$$

$$k_2(t) = e^{-2\alpha\lambda_2(T-t)}. \quad (54)$$

Since  $\partial_{g_i} J(\underline{g}, t) = k_i(t)$ , we see that

$$\lambda_1 \partial_{g_1} J(\underline{g}, t) + \lambda_2 \partial_{g_2} J(\underline{g}, t) = \lambda_1 e^{-2\alpha\lambda_1(T-t)} + \lambda_2 e^{-2\alpha\lambda_2(T-t)}. \quad (55)$$

Thus, there is a phase from  $t = -\infty$  until some time  $t^*$ , in which the expression is negative followed by a phase from  $t^*$  until  $t = \infty$ , where the whole expression is positive. This transition time  $t^*$  can be found by setting  $k_1(t) = k_2(t)$  and solving for  $t$ , which leads to

$$t^* = T - \frac{1}{2\alpha(\lambda_2 - \lambda_1)} \ln \left( \frac{\sigma_2 \lambda_2}{-\sigma_1 \lambda_1} \right). \quad (56)$$

Of course we are only interested in the case, when  $0 < t^* < T$  because otherwise either  $m_{\min}$  or  $m_{\max}$  will be optimal for the entire optimization. This is only the case if  $|\sigma_2 \lambda_2| > |\sigma_1 \lambda_1|$ . We can interpret  $t^*$  as the optimal transition time-point to get the minimal forward flow map  $\Psi_1(0 \rightarrow T, g_{0,1}) + \Psi_2(0 \rightarrow T, g_{0,2})$ .

Now let us turn to the ODEs in Eq. (47) to get another perspective on how to arrive at  $t^*$ . We already know from our analysis of the HJB-equation that there are two phases in the optimization, in which two different constant batch-sizes are employed in each phase. Thus we can calculate the forward flow map  $\sum_{i=1}^2 \Psi_i^m(0 \rightarrow T, g_{0,i}) := \sum_{i=1}^2 g_i(T)$  using some constant batch-size  $m_t = m_1$  and the forward flow map  $\sum_{i=1}^2 \Psi_i^{m^*}(0 \rightarrow T, g_{0,i}) := \sum_{i=1}^2 g_i^*(T)$  when using some batch-size schedule

$$m_t^* = \begin{cases} m_1 & \text{for } 0 \leq t < t^* \\ m_2 & \text{for } t^* \leq t < T \end{cases} \quad (57)$$

for another constant  $m_2 > m_1$  and some transition time  $t^*$ . For any constant batch-size schedule  $m_t = m$  and initial condition  $g_i(t') = g'_i$ , the solution to the ODE in Eq. (47) is

$$g_i(t) = \frac{\alpha\eta\sigma_i}{4m} + e^{-2\alpha\lambda_i(t-t')} \left( g'_i - \frac{\alpha\eta\sigma_i}{4m} \right). \quad (58)$$

Thus, running the ODE starting at  $g(0) = g_{0,i}$  with  $m_t = m_1$  in the interval  $[0, T]$  simply leads to

$$g_i(T) = \frac{\alpha\eta\sigma_i}{4m_1} + e^{-2\alpha\lambda_i T} \left( g_{0,i} - \frac{\alpha\eta\sigma_i}{4m_1} \right). \quad (59)$$

Instead, if we start at  $g(0) = g_{0,i}$  with  $m_t = m_1$ , but change the batch-size to  $m_t = m_2$  for  $t \in [t^*, T]$ , we will get

$$g_i^*(T) = \frac{\alpha\eta\sigma_i}{4m_2} \left( 1 - e^{-2\alpha\lambda_i(T-t^*)} \right) + \frac{\alpha\eta\sigma_i}{4m_1} e^{-2\alpha\lambda_i(T-t^*)} + e^{-2\alpha\lambda_i T} \left( g_{0,i} - \frac{\alpha\eta\sigma_i}{4m_1} \right) \quad (60)$$

Now, if we calculate  $\sum_{i=1}^2 g_i(T) - \sum_{i=1}^2 g_i^*(T)$  we get

$$\sum_{i=1}^2 g_i(T) - \sum_{i=1}^2 g_i^*(T) = \frac{\alpha\eta\sigma}{4} \left( \frac{1}{m_1} - \frac{1}{m_2} \right) \left( \sigma_1 \left( 1 - e^{-2\alpha\lambda_1(T-t^*)} \right) + \sigma_2 \left( 1 - e^{-2\alpha\lambda_2(T-t^*)} \right) \right). \quad (61)$$

We see that this expression is maximized for any  $m_2 > m_1$  with

$$t^* = T - \frac{1}{2\alpha(\lambda_2 - \lambda_1)} \ln \left( \frac{\sigma_2\lambda_2}{-\sigma_1\lambda_1} \right). \quad (62)$$

## A.5 Experiment setup

To empirically validate the results, the following experiment was conducted.

A loss function  $f(x)$  of the form

$$f(x) = \sum_{i=1}^n f_i(x) \quad (63)$$

was chosen, with  $f(x) = \frac{1}{2}x^T A x$ ,  $A = \text{diag}(\lambda_1, \lambda_2)$ , and  $f_i(x) = \frac{1}{2}(x + \xi_i)^T A(x + \xi_i)$  with i.i.d.  $\xi_i \sim \mathcal{N}([0, 0]^T, \Sigma)$ . Then we have

$$\mathbb{E}[\nabla f_i(x)] = \frac{1}{n} \sum_{i=1}^n A(x + \xi_i) = Ax = \nabla f(x), \quad (64)$$

and

$$\text{cov}(\nabla f_i(x)) = E[(Ax - A(x + \xi_i))(Ax - A(x + \xi_i))^T] \quad (65)$$

$$= E[A\xi_i\xi_i^T A^T] \quad (66)$$

$$= AE[\xi_i\xi_i^T]A^T \quad (67)$$

$$= A\Sigma A^T. \quad (68)$$

We chose a diagonal covariance matrix for  $\xi$ , i.e.  $\Sigma = \text{diag}(\sigma_1, \sigma_2)$ . Then we have that

$$\text{cov}(\nabla f_i(x)) = \text{diag}(\lambda_1^2\sigma_1, \lambda_2\sigma_2^2). \quad (69)$$

Furthermore, we have

$$\text{cov} \left( \frac{1}{m} \sum_{i=1}^m \nabla f_i(x) \right) = \frac{1}{m^2} \text{cov} \left( \sum_{i=1}^m \nabla f_i(x) \right) \quad (70)$$

$$= \frac{1}{m} \text{cov}(\nabla f_i(x)). \quad (71)$$

Thus, in the experiment we are looking at the following SGD update step

$$x_{k+1} = x_k - \alpha\eta \cdot \nabla f_i(x_k) \quad (72)$$

$$= x_k - \alpha\eta \cdot A(x_k + \xi_k), \quad (73)$$

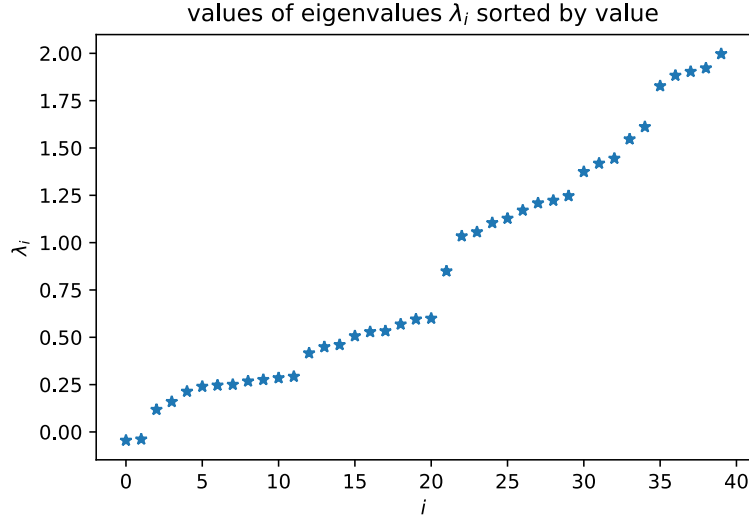

Figure 3: 40 Eigenvalue in the range of  $[-0.04, 1.96]$  with two negative eigenvalues and 38 positive eigenvalues.

where  $\xi_k$  is due to the stochasticity of the data samples.

For the experiment, 100.000 samples were generated, s.t.  $\mathbb{E}[\nabla f_i] = \nabla f$  and  $\text{cov}(\nabla f_i) = \text{diag}(100, 1000)$ . The parameters were chosen to be

$$\begin{aligned}\eta &= 1, \alpha = 0.3 \\ \gamma &= 0.99999 \\ x_0 &= [0, 5]^T\end{aligned}\tag{74}$$

## A.6 More experiments

### A.6.1 Optimizing non-convex function in higher dimensions

We also conducted another experiment for a loss function in higher dimensions. Specifically we chose  $d = 40$ , with  $p = 2$  negative eigenvalues and  $d - p = 38$  positive eigenvalues. The negative eigenvalues were uniformly sampled from  $[-0.0001, -0.05]$  and the positive eigenvalue were uniformly sampled from  $[0.1, 2]$ . The exact distribution of eigenvalues for the experiment can be found in Fig. 3. The loss function was chosen to be  $f(\theta) = \theta^T A \theta$  with  $A = \text{diag}(\lambda_1, \dots, \lambda_d)$ .

The covariance matrix  $\Sigma$  of  $\xi$  was chosen to be a diagonal matrix with the diagonal entries being i.i.d. uniformly distributed from  $[100, 1000]$ . A number of 100.000 samples were generated, distributed as  $\sim \mathcal{N}(0, \Sigma)$ . The experiment was repeated for 1000 runs of each 500 iterations.

Other parameters, which were chosen are:

$$\begin{aligned}x_0 &\sim \mathcal{U}([-5, 5]) \\ \eta &= 1 \\ \alpha &= 0.1 \\ \gamma &= 0.9999\end{aligned}\tag{75}$$

$t^*$  was found numerically to be approx. 368.87. The non-constant schedules diverge first, but converge to a loss five orders of magnitudes lower compared to using the maximal batch-size from the beginning. Both non-constant schedules have almost the exact terminal loss, but the adaptive batch-size schedule evaluates only 48.3 % as many samples.

### A.6.2 Optimizing convex function in higher dimensions

For the sake of completeness we also looked at applying the batch-size schedule on a convex noisy quadratic model.

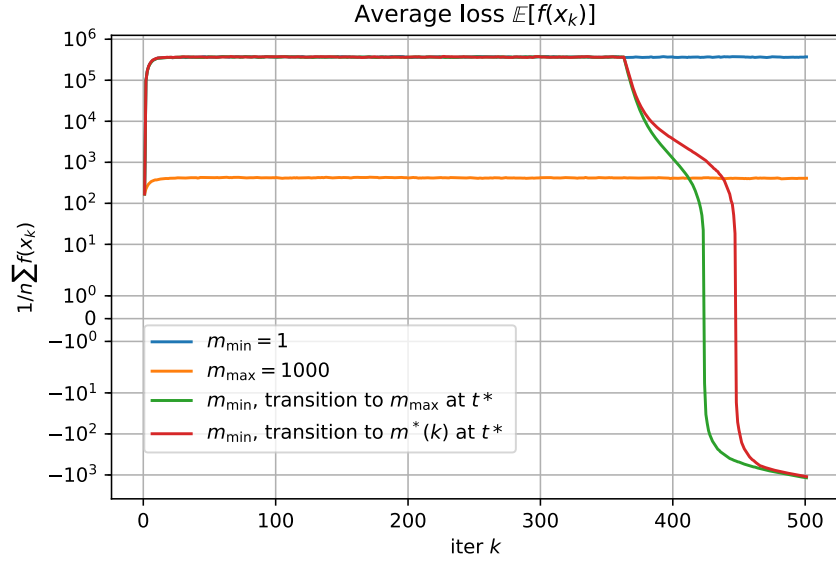

Figure 4: Average loss over 1000 runs, initialized with  $f(x_0) = 187.56$ . With a constant batch-size (either  $m_{\min} = 1$  (blue) or  $m_{\max} = 1000$  (red)) SGD is not able to find the descent direction. Whereas with an adaptive batch-size both schedules are able to find the descent direction. Using the maximal batch-size leads to a faster convergence (green), but the terminal value is approximately the same with both schedules.

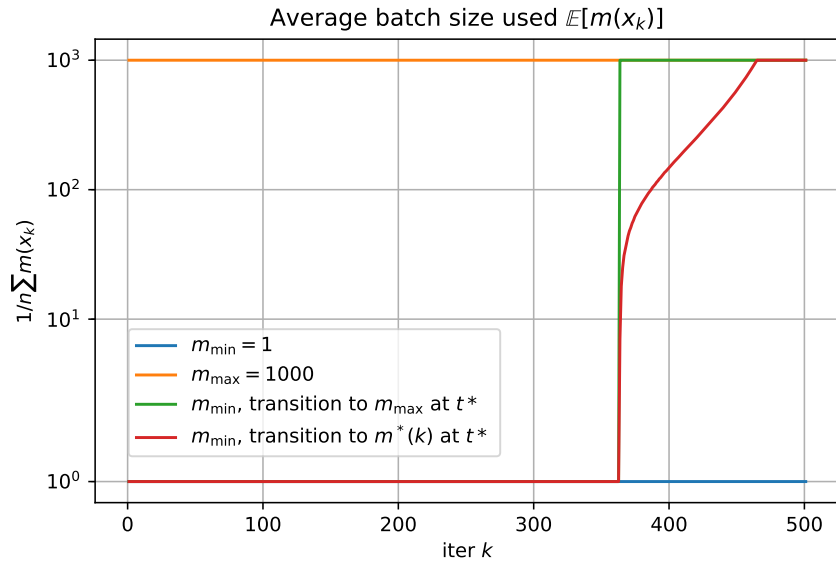

Figure 5: Average batch-size per iteration averaged over 1000 runs



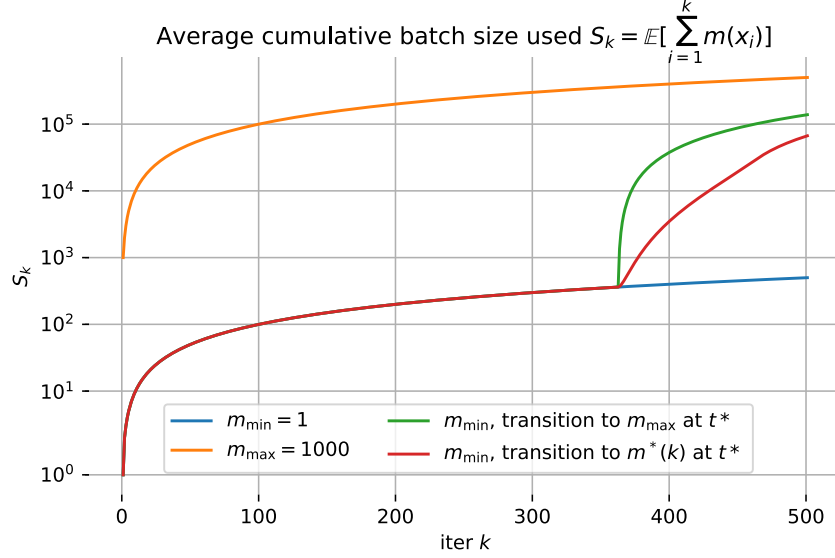

Figure 6: Average cumulative batch-sizes over 1000 runs. Note that while the terminal loss in Fig. 4 is approximately the same, the adaptive schedule evaluates only 48.3 % as many samples compared to the schedule jumping to  $m_{\max}$  directly.

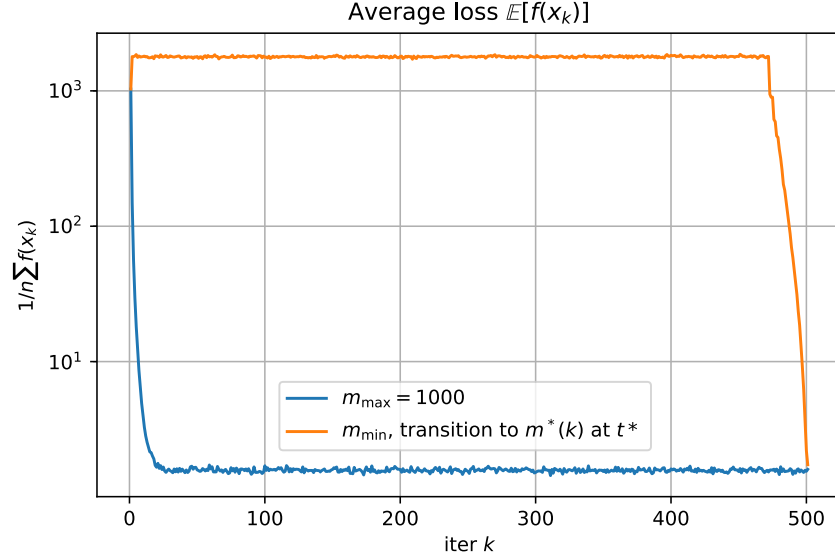

Figure 7: Average loss over 1000 runs. With a constant batch-size (either  $m_{\min} = 1$  (blue) or  $m_{\max} = 1000$  (red)) SGD is not able to find the descent direction. Whereas with an adaptive batch-size both schedules are able to find the descent direction. Using the maximal batch-size leads to a faster convergence (green), but the terminal value is approximately the same with both schedules.

We chose  $d = 40$  and uniformly sampled the eigenvalues  $\lambda_i$ ,  $i = 1, \dots, d$  in the range of  $[1, 10]$ . The loss function was chosen to be  $f(\theta) = \theta^T A \theta$  with  $A = \text{diag}(\lambda_1, \dots, \lambda_d)$ . As above, the covariance matrix  $\Sigma$  of  $\xi$  was chosen to be a diagonal matrix with the diagonal entries being i.i.d. uniformly distributed from  $[1, 10]$ . A number of 100.000 samples were generated, distributed as  $\sim \mathcal{N}(\underline{0}, \Sigma)$ . The experiment was repeated for 1000 runs of each 500 iterations. Other parameters were chosen the same as in Eq. (75).

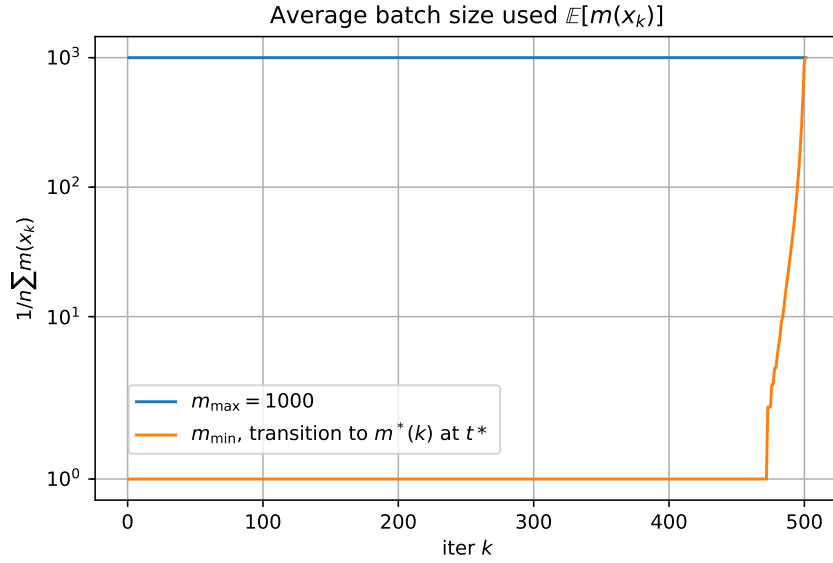

Figure 8: Average batch-size per iteration averaged over 1000 runs. The adaptive batch-size schedule increases exponentially only towards the end, but achieves almost the same terminal loss.

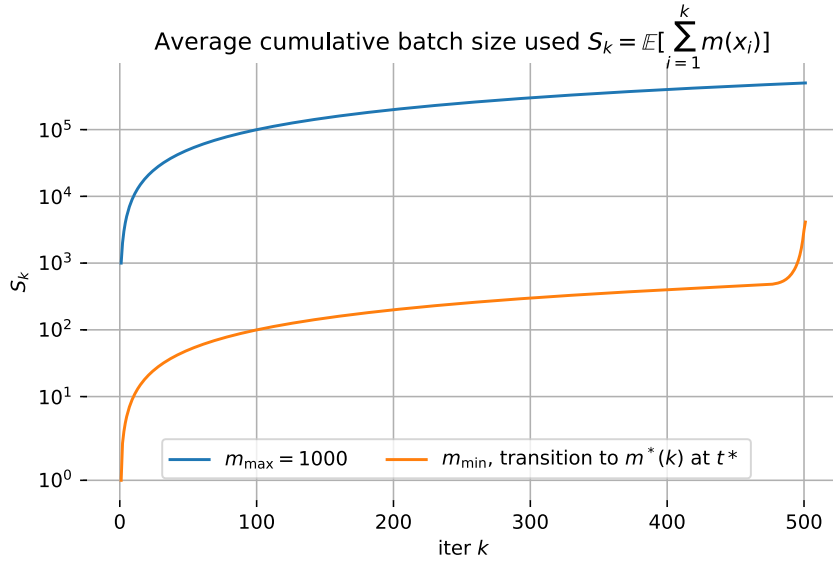

Figure 9: Average cumulative batch-sizes over 1000 runs. Note that while the terminal loss in Fig. 7 is approximately the same, the adaptive schedule evaluates only 0.8 % as many samples compared to using a batch-size of  $m_{\max}$  from the beginning.
